# Supplementary material
Source: Frontiers journal article supplement (https://www.frontiersin.org/articles/134927)
Supplement: Table_1.PDF [file Table_1.PDF]

**Table S1:** Standard deviation and range of Cyanophyta biovolume from the Lake Mendota Deep Hole location between the years 1995-2010. All of the data were split into three time periods (phases) based on the 2009-2011 microcystin data. The toxic phase represents the period when mean microcystin concentrations were significantly greater than 1 µg L<sup>-1</sup> (days 170-250). Significance between the phases was tested using a Kruskal-Wallis test (K-W;  $p < 0.05$ ).

| <b>Cyanophyta</b>    | <b>Pre-toxic</b>    | <b>Toxic</b>             | <b>Post-toxic</b>       | <b>K-W</b> |
|----------------------|---------------------|--------------------------|-------------------------|------------|
| Total biovolume      | 290000<br>0-2500000 | 3000000<br>2000-17000000 | 1000000<br>3600-5000000 | a, b, c    |
| <i>Aphanizomenon</i> | 260000<br>0-2300000 | 2800000<br>0-16000000    | 920000<br>0-5000000     | a, b, c    |
| <i>Microcystis</i>   | 39000<br>0-400000   | 760000<br>0-4800000      | 210000<br>650-890000    | a, b, c    |
| <i>Oscillatoria</i>  | 4700<br>0-44000     | 540000<br>0-4300000      | 380000<br>0-2600000     | a, b, c    |
| <i>Aphanothece</i>   | 16000<br>0-130000   | 280000<br>0-2200000      | 38000<br>0-220000       | a, b, c    |
| <i>Synechococcus</i> | 2300<br>0-9300      | 5000<br>0-25000          | 3900<br>0-21000         | a, c       |
| <i>Synechocystis</i> | 5000<br>0-46000     | 2000<br>0-9500           | 3100<br>0-11000         |            |

a = significant difference between Pre and Toxic; b = significant difference between Toxic and Post; c = significant difference between Pre and Post phases
